# Supplementary material for: Profound Coordinated Alterations of Intratumoral NK Cell Phenotype and Function in Lung Carcinoma
Source: Oxford University Press journal article supplement (doi:10.1158/0008-5472.can-10-4179), 2011-06-28

Supplemental Figure 1

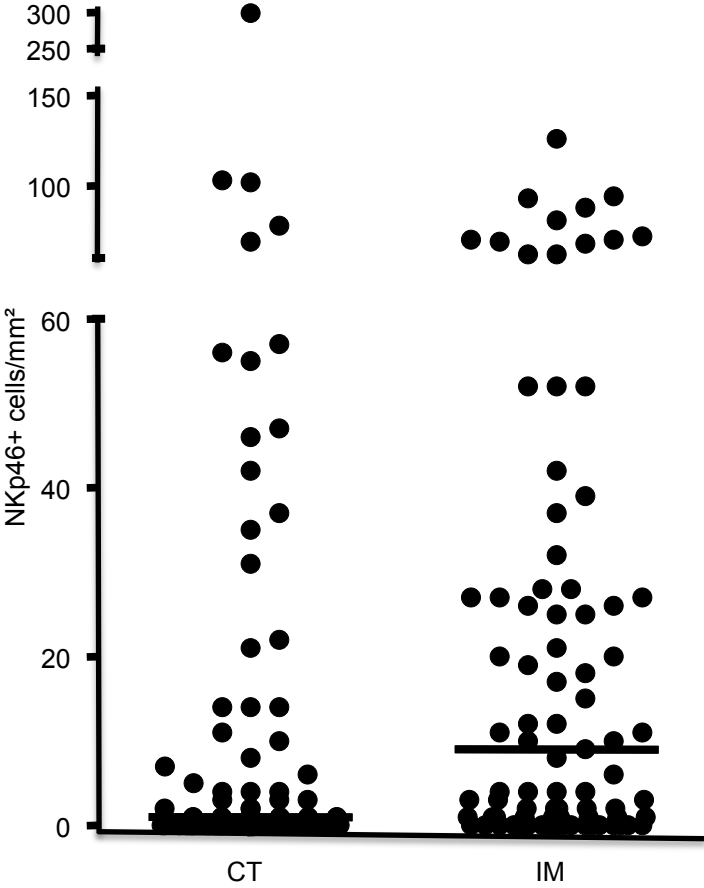

# Supplemental Figure 2

## Tumor

## Blood

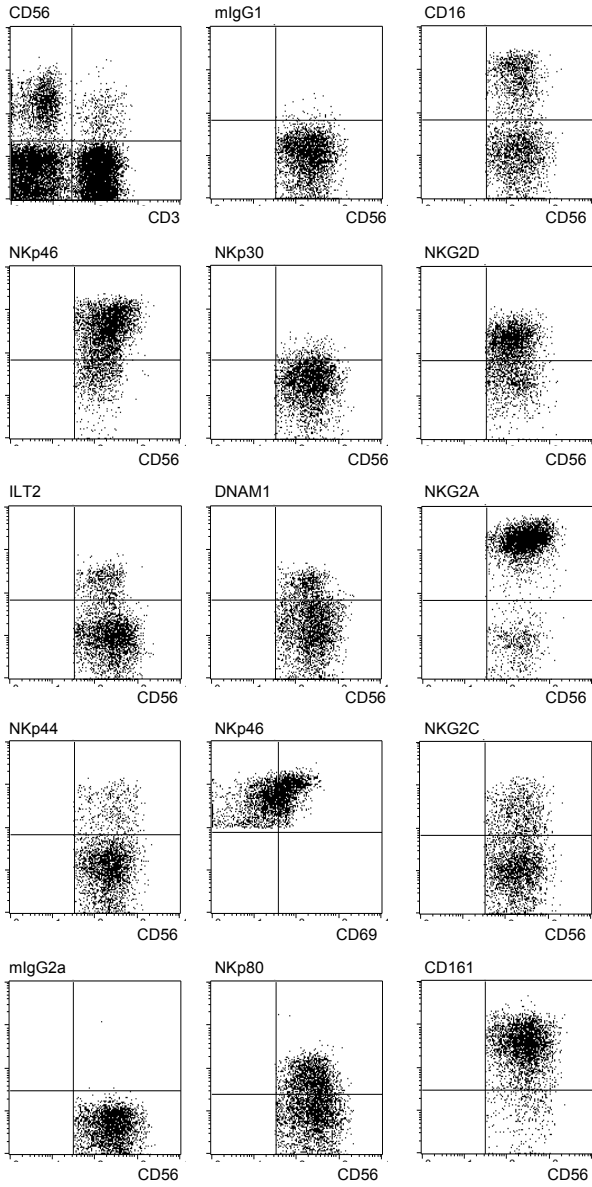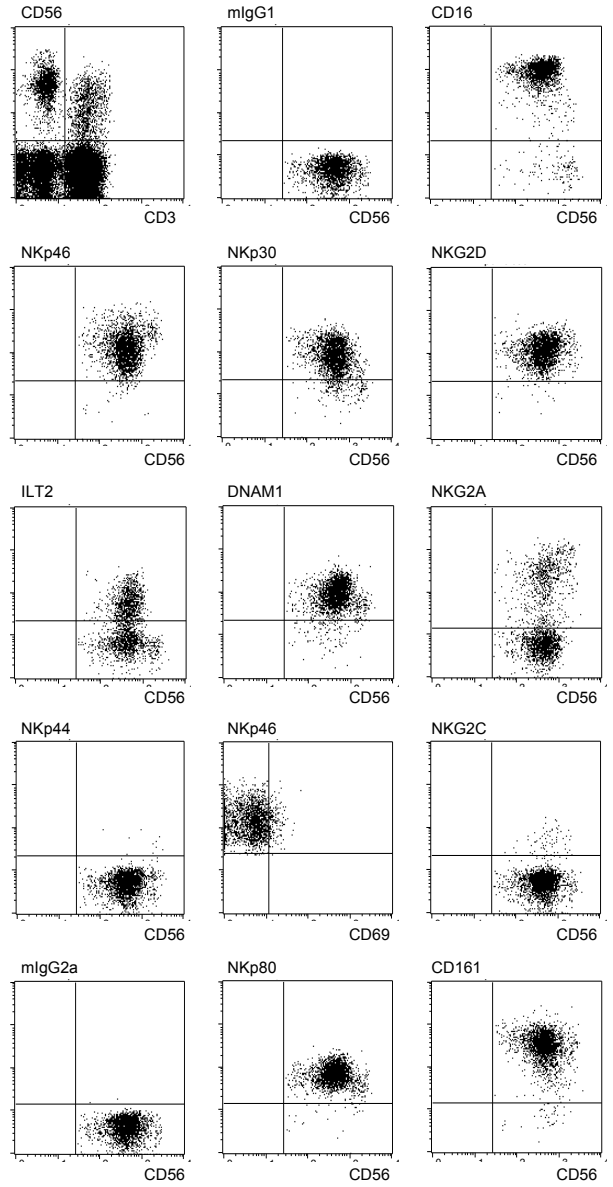

Supplemental Figure 3

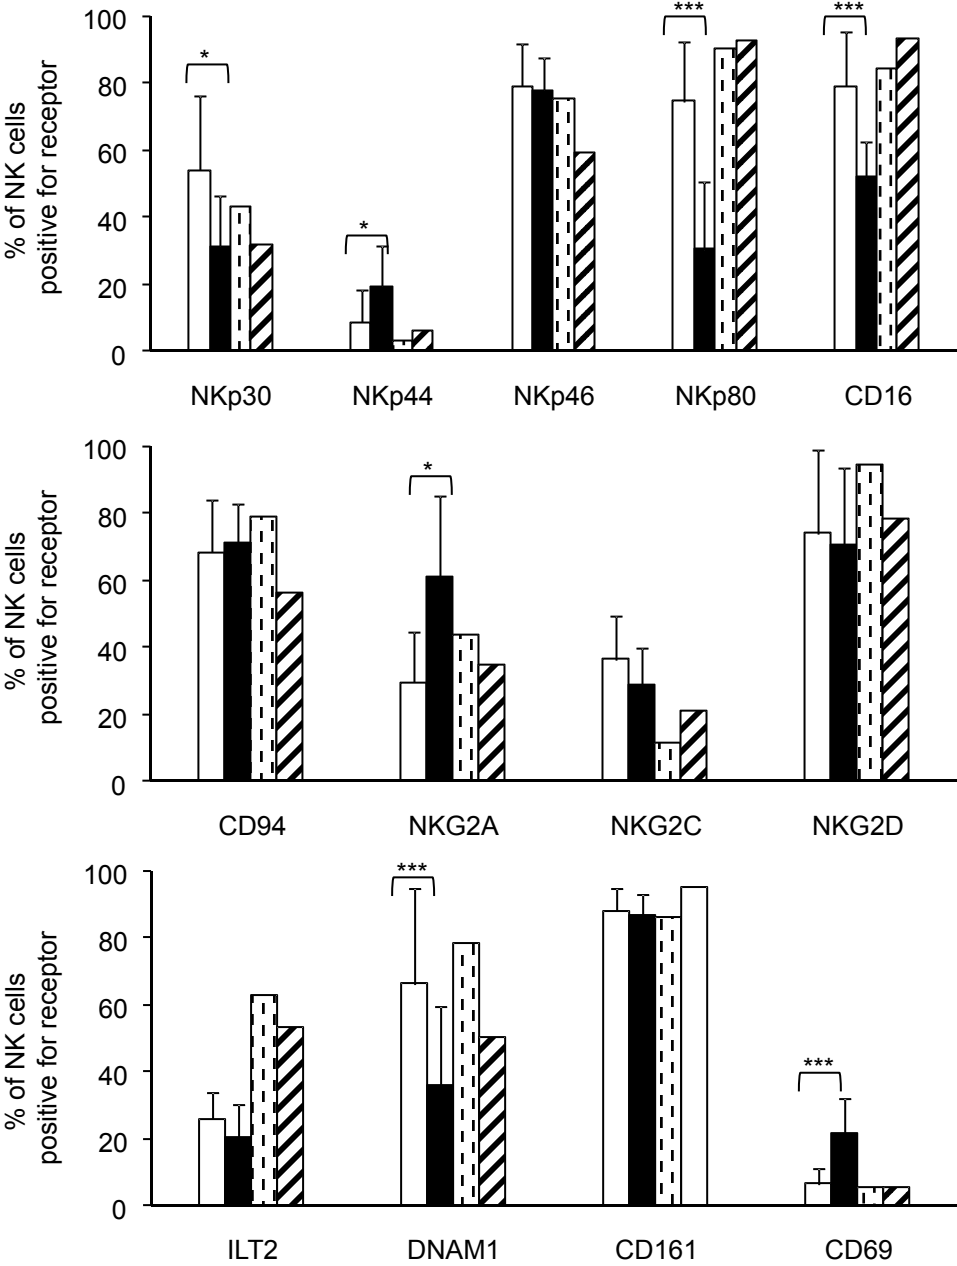

Supplemental Figure 4

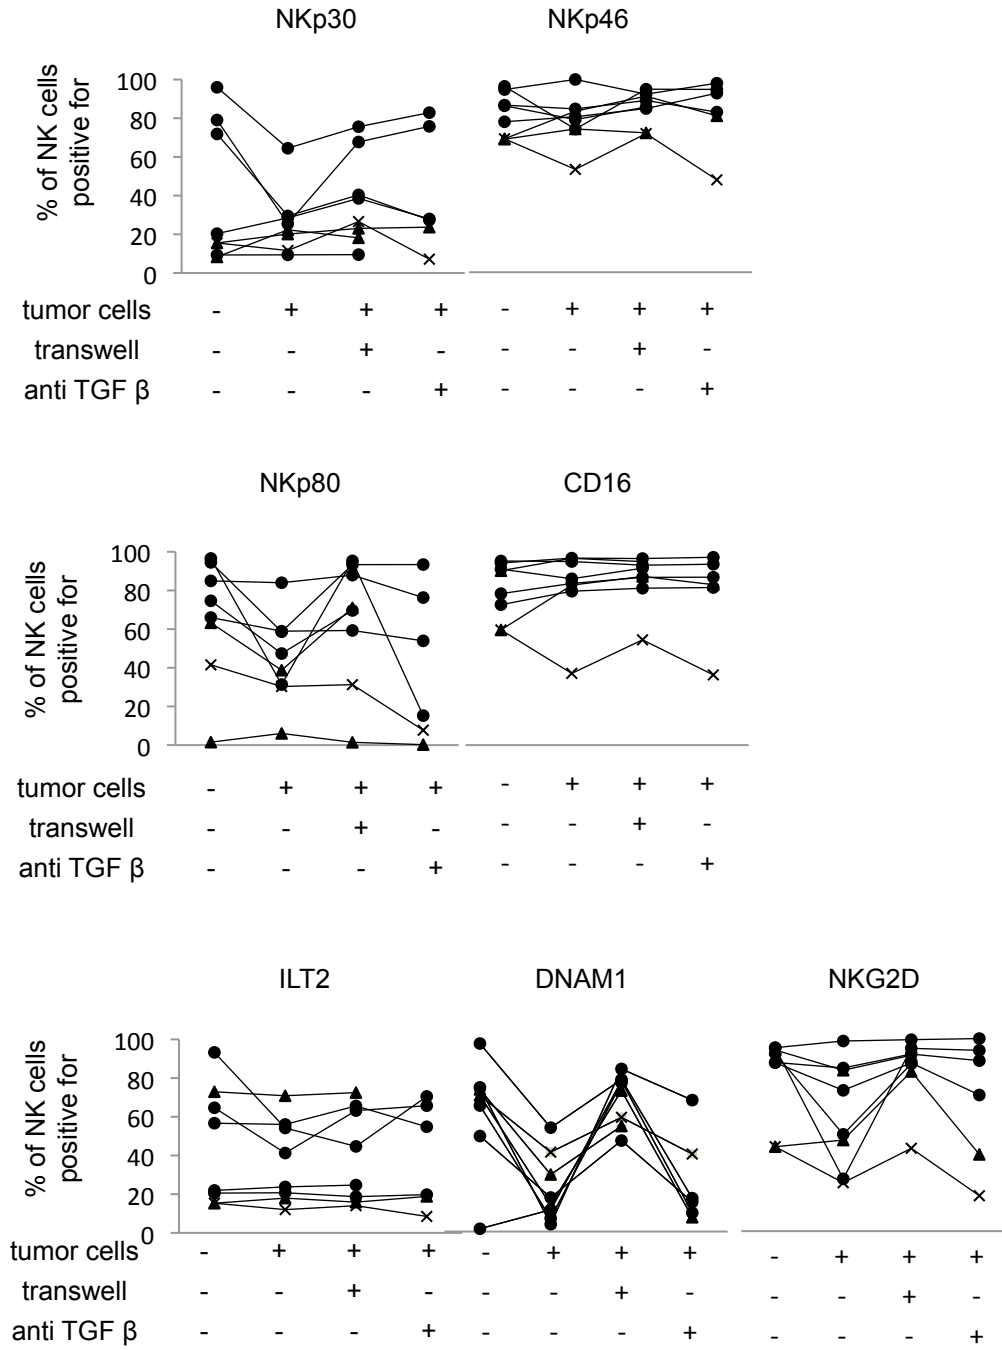

Supplemental Figure 5

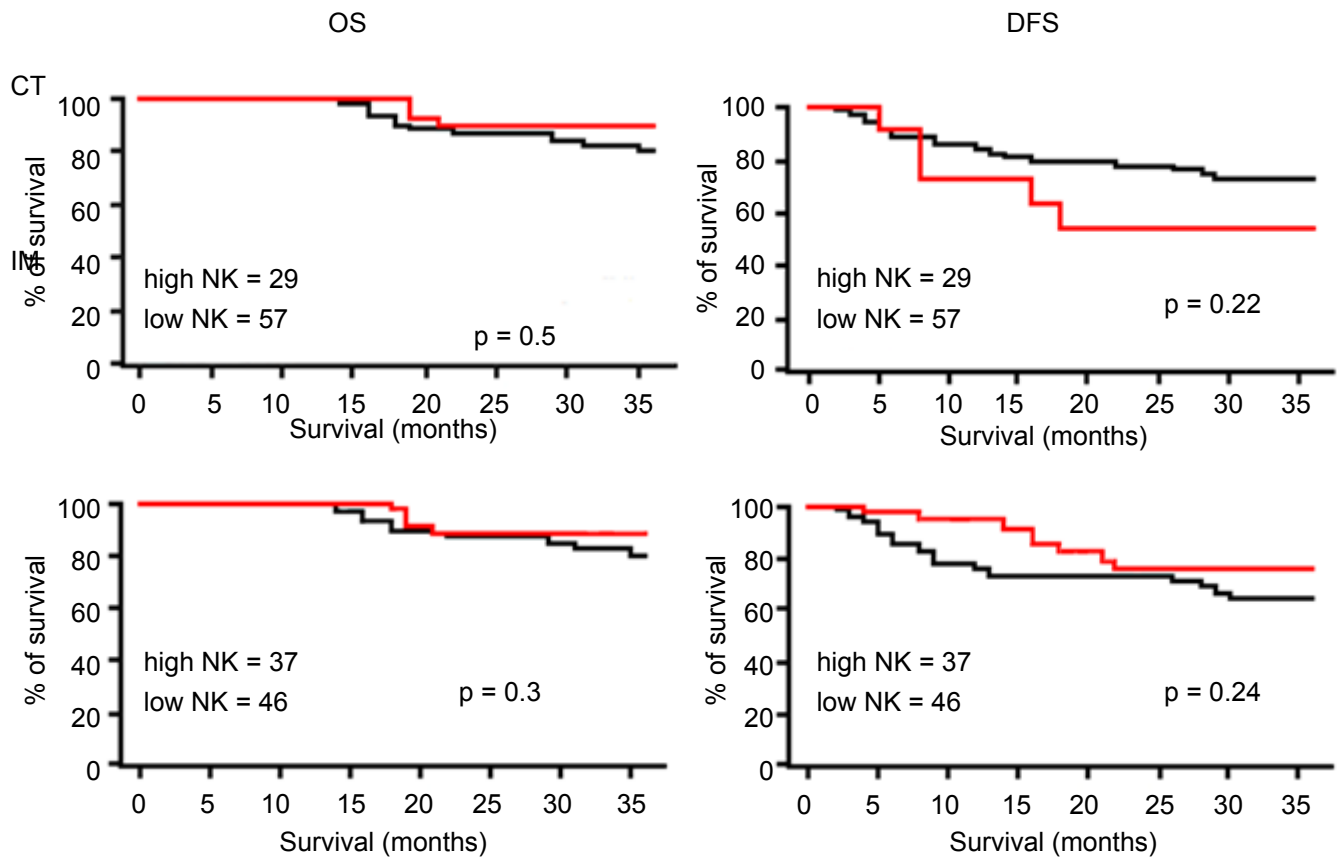

Supplement: 00085472can104179-sup-figs_1-5.pdf [file 00085472can104179-sup-figs_1-5.pdf]
